# Supplementary material for: Non-photochromic solar energy storage in carbon nitride surpassing blue radicals for hydrogen production
Source: Royal Society of Chemistry journal article supplement (doi:10.1039/d1ta10091b), 2022-01-01
Supplement: d1ta10091b1.pdf [file d1ta10091b1.pdf]

## Supplementary Information

### **Non-Photochromic Solar Energy Storage in Carbon Nitride Surpassing Blue Radicals for Hydrogen Production**

Pei-Shan Wu<sup>a</sup>, Tzu-Jen Lin<sup>b</sup>, Sheng-Shu Hou<sup>a</sup>, Chih-Chia Chen<sup>a</sup>, Dai-Ling Tsai<sup>a</sup>, Kuan-Hsiang Huang<sup>a</sup>, and Jih-Jen Wu<sup>a,\*</sup>

<sup>a</sup>Department of Chemical Engineering, National Cheng Kung University, Tainan 70101, Taiwan

<sup>b</sup>Department of Chemical Engineering, Chung Yuan Christian University, Taoyuan City 32023, Taiwan

\*Corresponding author.

E-mail: wujj@mail.ncku.edu.tw

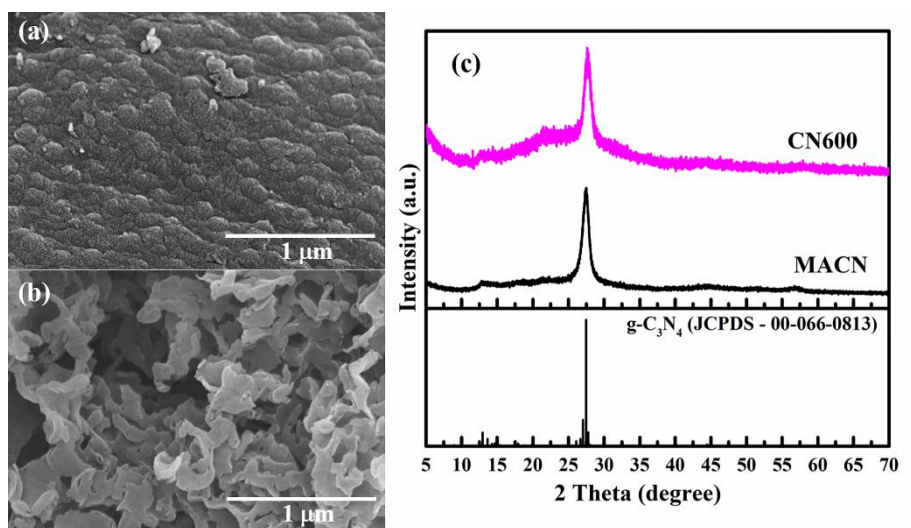

**Fig. S1.** SEM images of (a) MACN and (b) CN600. (c) XRD patterns of MACN and CN600.

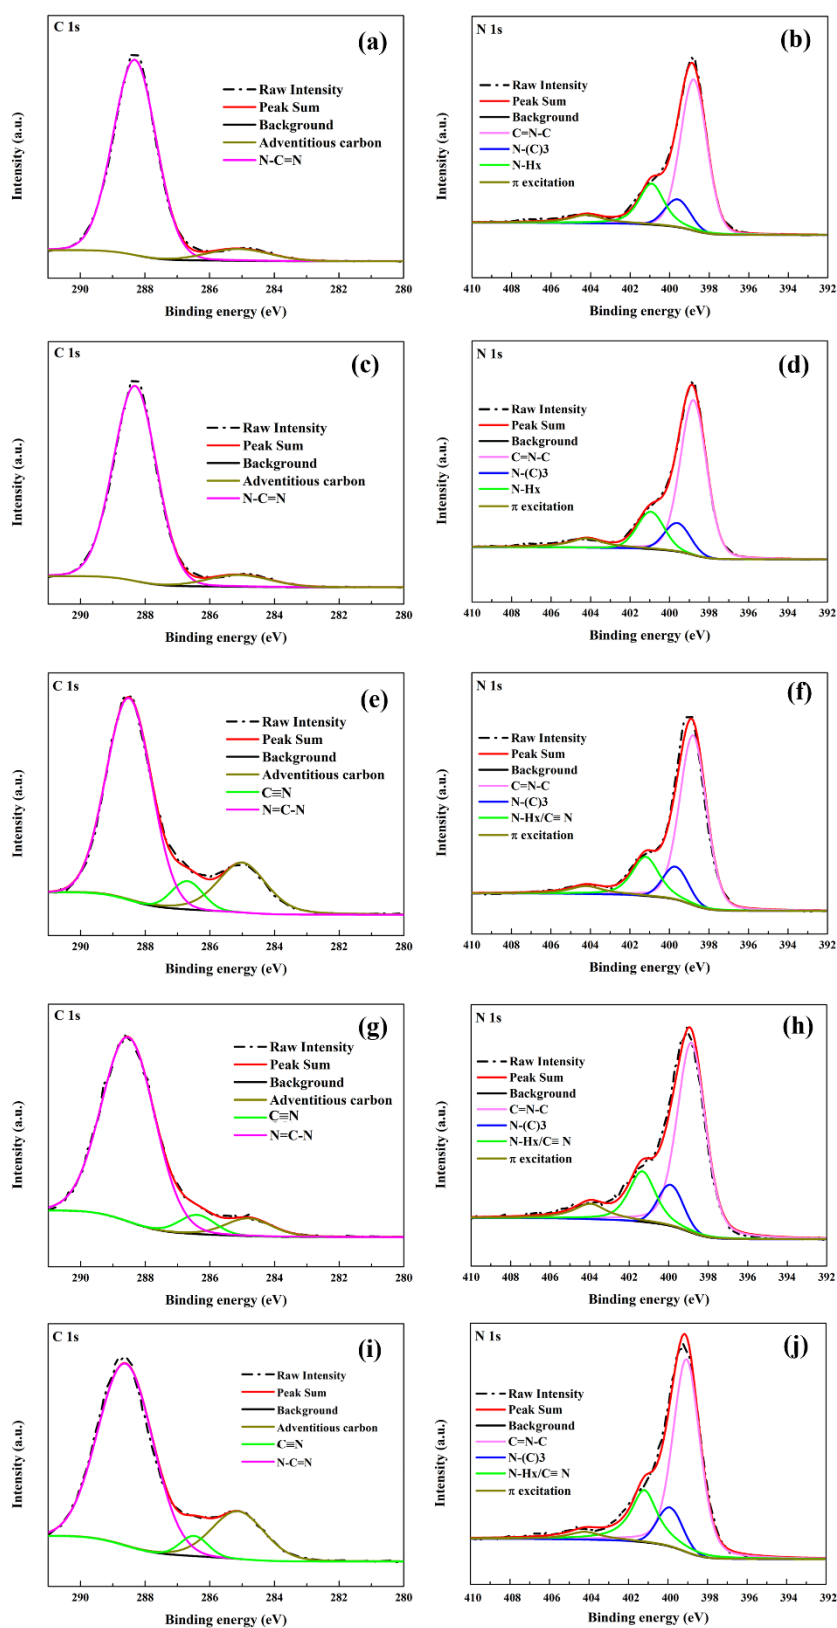

**Fig. S2.** C 1s and N 1s XPS spectra of (a),(b) MACN; (c),(d) CN600; (e),(f) KMACN400; (g),(h) KMACN400; and (i),(j) KCN, respectively.

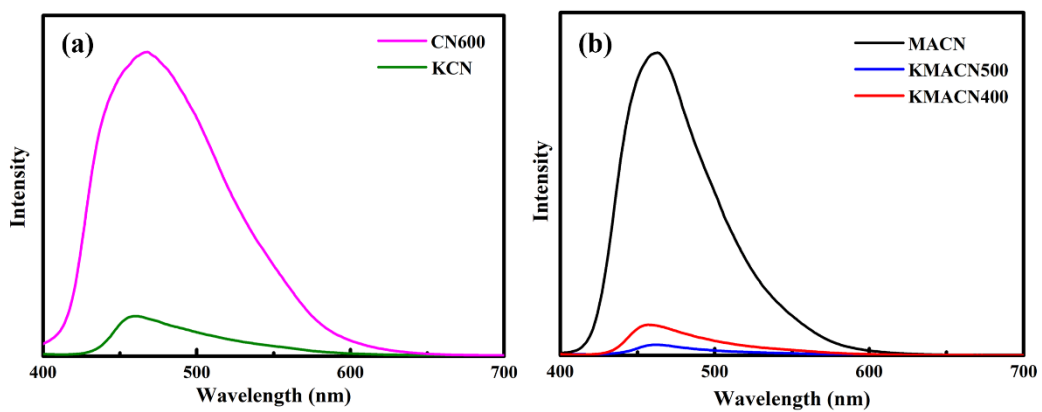

**Fig. S3.** PL spectra of (a) CN600 and KCN as well as (b) MACN, KMACN400, and KMACN500.

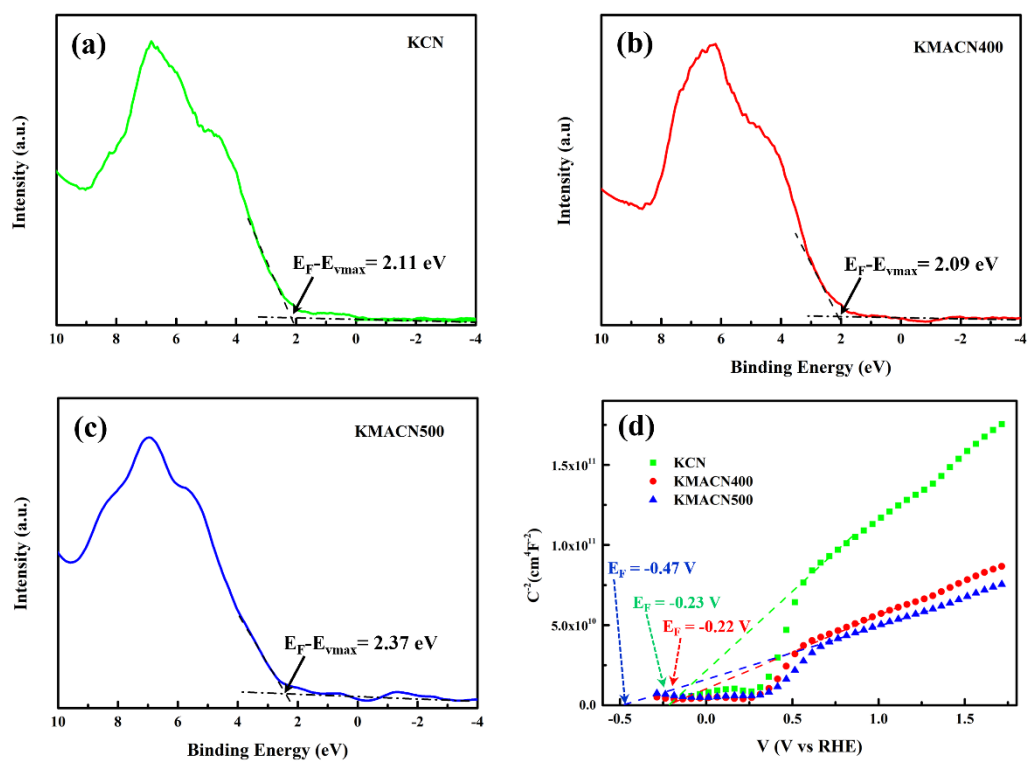

**Fig. S4.** XPS valence band spectra of (a) KCN, (b) KMACN400, and (c) KMACN500. (d) Mott-Schottky plots of the three KPHIs.

## Calculation of AQY

The AQY values shown in Fig. 5c are calculated based on the following eqs (S1)-(S3). The measured monochromatic light power densities and hydrogen production rates (using KMACN500 as an example) under monochromatic light irradiation for AQY calculation are listed in Table S1.

$$AQY(\lambda)(\%) = \{[No. of electrons(\lambda)/sec]/[No. of photons(\lambda)/sec]\} \times 100\% \quad (S1)$$

$$No. of photons(\lambda)/sec$$

$$= \{monochromatic light power density(\lambda) (W/cm^2) \\ \times irradiated area (cm^2) \times \frac{1 \left[ \frac{(J/sec)}{W} \right]}{1.6 \times 10^{-19} \left( \frac{J}{eV} \right) \times \left[ \frac{energy(\lambda) (eV)}{photon} \right]} \} \quad (S2)$$

$$No. of electrons(\lambda)/sec$$

$$= H_2 production rate(\lambda) \left( \frac{mol}{sec} \right) \times 2 \left( \frac{mol of electrons}{mol of H_2} \right) \times 6 \\ \times 10^{23} \left( \frac{no. of electrons}{mol of electrons} \right) \quad (S3)$$

**Table S1.** Monochromatic light power densities, hydrogen production rates under monochromatic light irradiation, and calculated AQYs for KMACN500. (Irradiated area = 9.375 cm<sup>2</sup>)

| Wavelength/Energy<br>of monochromatic<br>light (nm/eV) | Power density<br>(W/cm <sup>2</sup> ) | No. of<br>photon/sec  | H <sub>2</sub> production<br>rate (mol/s) | No. of<br>electron/sec | AQY(%) |
|--------------------------------------------------------|---------------------------------------|-----------------------|-------------------------------------------|------------------------|--------|
| 600/2.07                                               | 7.49x10 <sup>-4</sup>                 | 2.12x10 <sup>16</sup> | 1.94x10 <sup>-12</sup>                    | 2.36x10 <sup>12</sup>  | 0.011  |
| 550/2.25                                               | 6.77x10 <sup>-4</sup>                 | 1.76x10 <sup>16</sup> | 3.89x10 <sup>-13</sup>                    | 4.59x10 <sup>11</sup>  | 0.003  |
| 500/2.48                                               | 6.10x10 <sup>-4</sup>                 | 1.44x10 <sup>16</sup> | 7.08x10 <sup>-12</sup>                    | 8.52x10 <sup>12</sup>  | 0.059  |
| 450/2.76                                               | 5.09x10 <sup>-4</sup>                 | 1.08x10 <sup>16</sup> | 2.79x10 <sup>-10</sup>                    | 3.36x10 <sup>14</sup>  | 3.1    |
| 400/3.1                                                | 1.97x10 <sup>-4</sup>                 | 3.73x10 <sup>15</sup> | 4.86x10 <sup>-10</sup>                    | 5.85x10 <sup>14</sup>  | 15.7   |

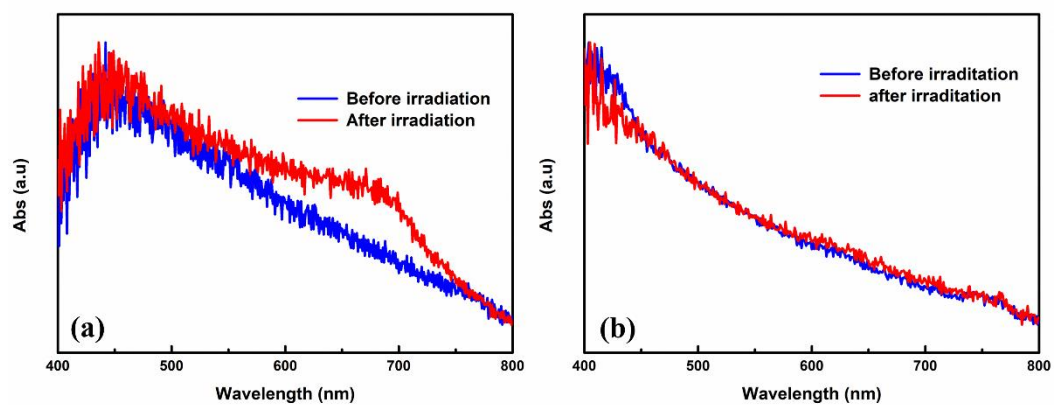

**Fig. S5.** Absorption spectra of (a) KMACN500 and (b) KCN solutions before and after irradiation.

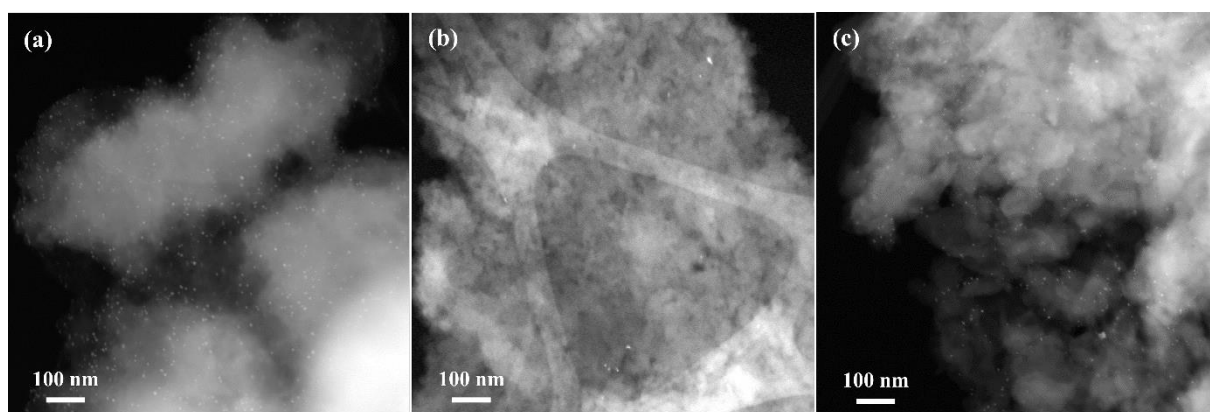

**Fig. S6.** HAADF STEM images of (a) KCN, (b) KMACN500, and (c) KAMCN400 after dark photocatalysis.



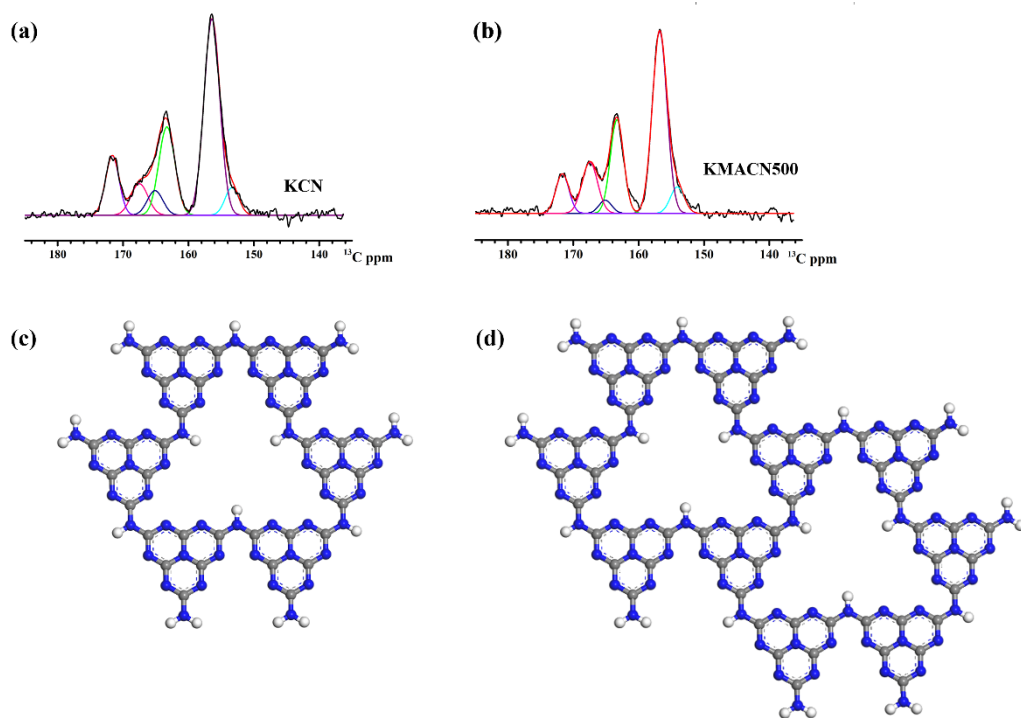

**Fig. S7.** Deconvolutions of  $^{13}\text{C}$  direct excitation spectra of (a) KCN and (b) KMACN500. (c) and (d) molecular structures of HPHIs with different sizes. Hydrogen, carbon, and nitrogen are represented by white, grey, and blue colors.

**Table S2.** Numbers of C1-C5 in KCN and KMACN500 estimated by area ratios of deconvoluted peaks to C1 (C-N<sub>c</sub>) in Fig. S6a and b based on the carbon atom numbers in HPHIs with different sizes.

|                | <b>C-N<sub>c</sub></b><br><b>(C1)</b> | <b>C-NH</b><br><b>(C2)</b> | <b>C-NH<sub>2</sub></b><br><b>(C3)</b> | <b>C-N<sup>·</sup></b><br><b>(C4)</b> | <b>C-N-C≡N</b><br><b>(C5)</b> | $\sum_{i=2}^5 C_i$ |
|----------------|---------------------------------------|----------------------------|----------------------------------------|---------------------------------------|-------------------------------|--------------------|
| KCN            | 18                                    | 8                          | 2                                      | 4                                     | 4                             | 18                 |
| PHI (Fig. S6c) | 18                                    | 12                         | 6                                      | 0                                     | 0                             | 18                 |
| KMACN500       | 30                                    | 14                         | 2                                      | 8                                     | 6                             | 30                 |
| PHI (Fig. S6d) | 30                                    | 22                         | 8                                      | 0                                     | 0                             | 30                 |

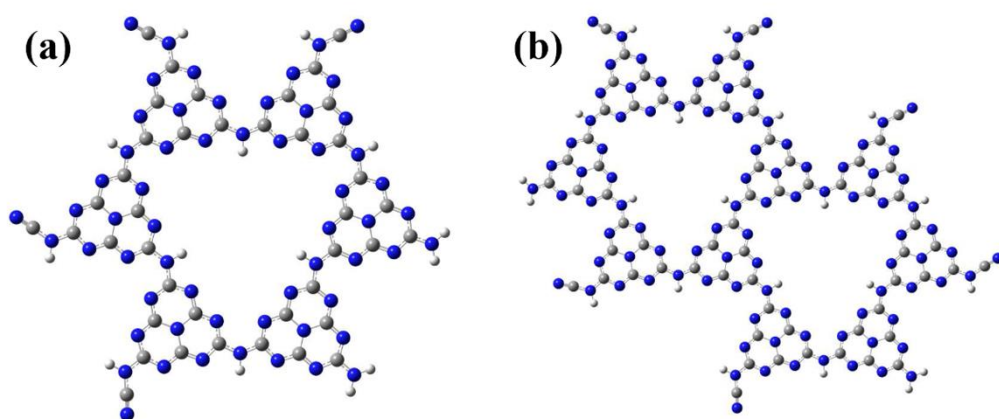

**Fig. S8.** Optimized structures of cyanamide-functionalized HPHIs corresponding to (a) KCN and (b) KMACN500. Hydrogen, carbon, and nitrogen atoms are represented by white, grey, and blue colors.

**Table S3.** HOMO energy, LUMO energy and HOMO-LUMO Gap for the optimized molecular models for KCN and KMACN500 shown in Figures 8 and 9.

| Optimized Structure | HOMO energy<br>(eV) | LUMO energy<br>(eV) | HOMO-LUMO Gap<br>(eV) |
|---------------------|---------------------|---------------------|-----------------------|
| KCN                 |                     |                     |                       |
| KCN_A               | -6.38               | -3.30               | 3.08                  |
| KCN_B               | -6.15               | -3.74               | 2.41                  |
| KCN_C               | -5.62               | -4.09               | 1.53                  |
| KMACN500            |                     |                     |                       |
| KMACN500_A          | -6.39               | -3.45               | 2.94                  |
| KMACN500_B          | -6.00               | -3.56               | 2.44                  |
| KMACN500_C          | -5.84               | -3.94               | 1.90                  |
| KMACN500_D          | -5.23               | -4.50               | 0.73                  |

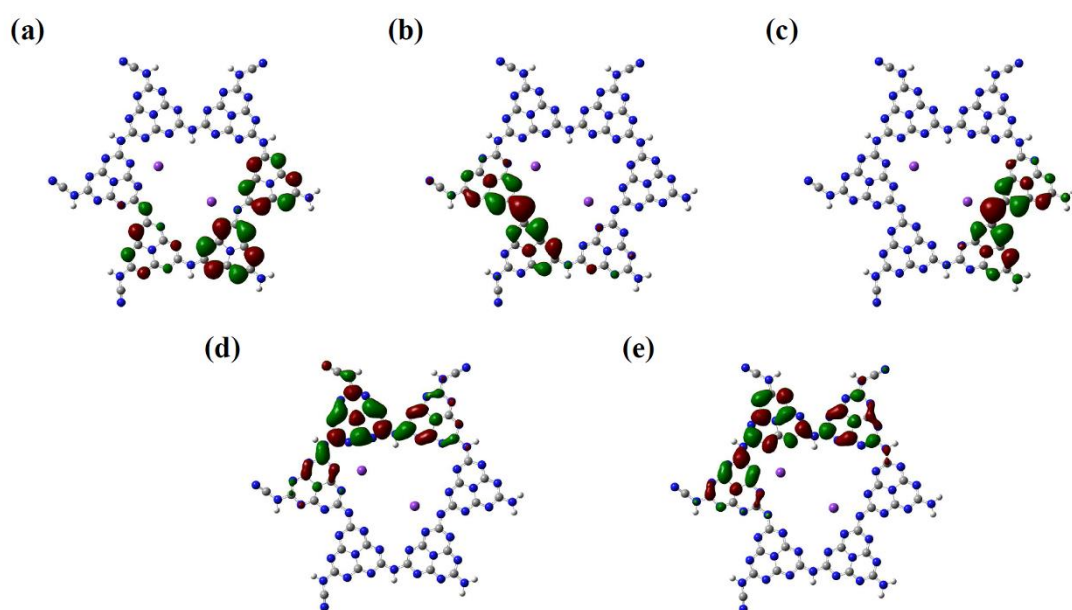

**Fig. S9.** Frontier molecular orbitals (a) HOMO-2, (b) HOMO-1, (c) HOMO, (d) LUMO, and (e) LUMO+1 for optimized KCN<sub>2</sub>B. Hydrogen, carbon, nitrogen, and potassium atoms are represented by white, grey, blue, and purple colors. The isosurface value is 0.02 a.u.

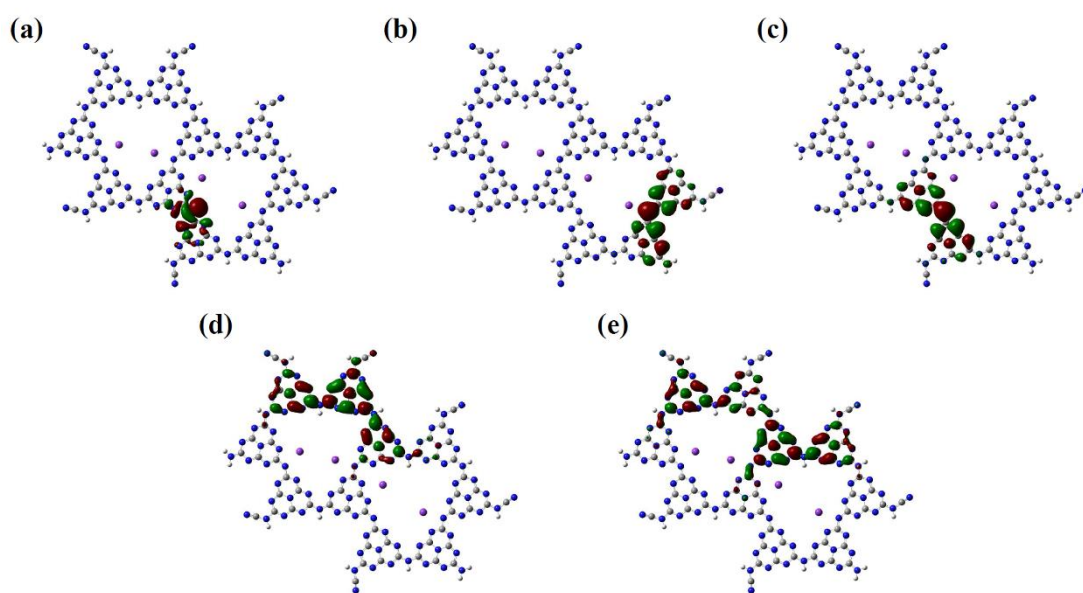

**Fig. S10.** Frontier molecular orbitals (a) HOMO-2, (b) HOMO-1, (c) HOMO, (d) LUMO, and (e) LUMO+1 for optimized KMACN500\_B. Hydrogen, carbon, nitrogen, and potassium atoms are represented by white, grey, blue, and purple colors. The isosurface value is 0.02 a.u.

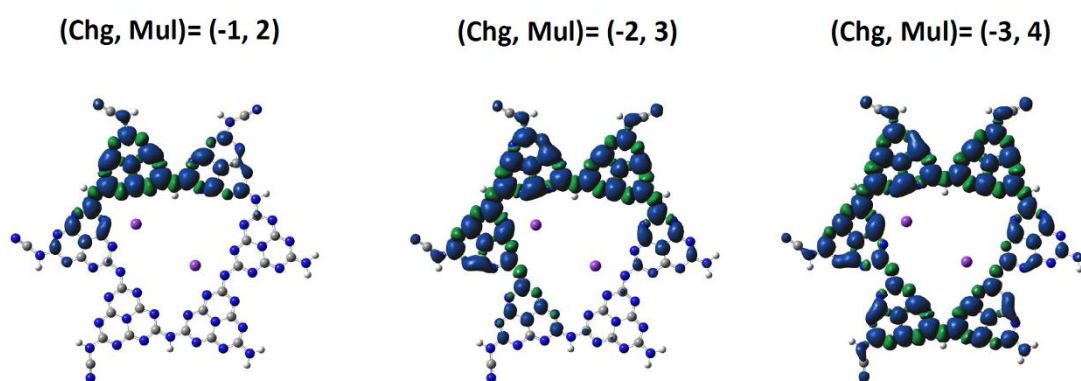

**Fig. S11.** Spin density distribution for KCN\_B at vertical multi-anion states with storage of 1-3 electrons. The isosurface value is 0.0004 a.u.

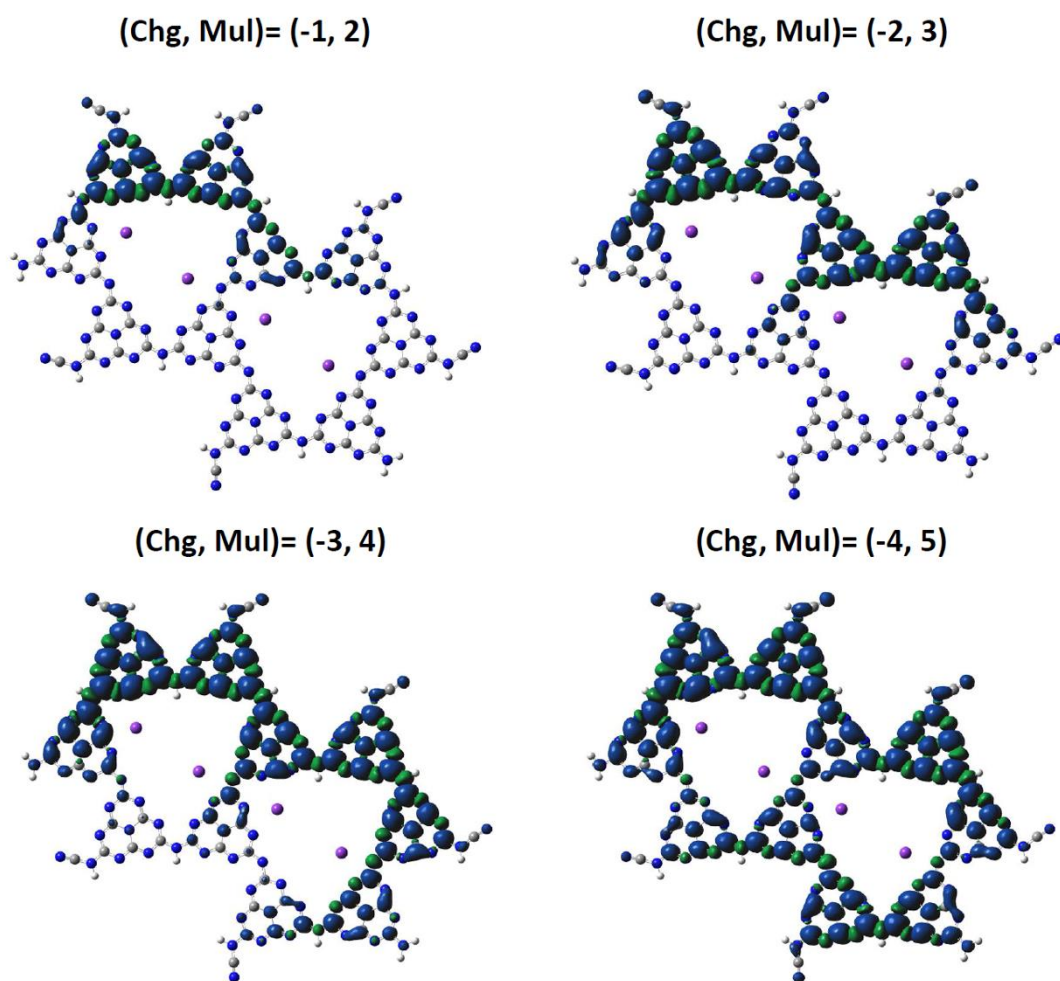

**Fig. S12.** Spin density distribution for KMACN500\_C at vertical multi-anion states with storage of 1-4 electrons. The isosurface value is 0.0004 a.u.
